# Supplementary material for: Activation of the omega-3 fatty acid receptor GPR120 mediates anti-inflammatory actions in immortalized hypothalamic neurons
Source: PubMed Central journal article supplement (PMC3986641; doi:10.1186/1742-2094-11-60), 2014-03-27
Supplement: 1742-2094-11-60-S1.pdf [file 1742-2094-11-60-S1.pdf]

**Supplemental Table 1 – Primers used for screening of markers.**

|                   | <b>Primer Sequence</b>                                                                                                 |
|-------------------|------------------------------------------------------------------------------------------------------------------------|
| <b>Histone 3a</b> | <b>Forward: 5' - CGC TTC CAG AGT GCA GCT ATT - 3'</b><br><b>Reverse: 5' - ATC TTC AAA AAG GCC AAC CAG AT - 3'</b>      |
| <b>NF-κB</b>      | <b>Forward: 5' - AGT GAC AGC GAC AGT GAC AAC AGA - 3'</b><br><b>Reverse: 5' - TCA TCA GGA AGA GGT TTG GCT GCT - 3'</b> |
| <b>TNFα</b>       | <b>Forward: 5' - GCT GTA CCT TAT CTA CTC CC - 3'</b><br><b>Reverse: 5' - CTC CTG GTA TGA AAT GGC - 3'</b>              |
| <b>IKK-β</b>      | <b>Forward: 5' - TTG GCA TCA CAT CGG ACA AAC TGC - 3'</b><br><b>Reverse: 5' - TCT GCA GTG CCA TCA TCC GTT CTA - 3'</b> |
| <b>TLR4</b>       | <b>Forward: 5' - GCT TGA ATC CCT GCA TAG - 3'</b><br><b>Reverse 5' - GCT CAG ATC TAG GTT CTT GG - 3'</b>               |
| <b>IκBα</b>       | <b>Forward: 5' - TGC CTG GCC AGT GTA GTC TT - 3'</b><br><b>Reverse: 5' - CAA AGT CAC CAA GTG CTC CAC GAT - 3'</b>      |
| <b>TNFα Rec</b>   | <b>Forward: 5' - TAG CCA AAC TCC ACA CAT CCC TGT -3'</b><br><b>Reverse: 5' - ACA TCA GCA GAC CCA GAG TTG TCA - 3'</b>  |
| <b>GRP-78</b>     | <b>Forward: 5' - GAT GAA GTT CAC TGT GGT GGC GG - 3'</b><br><b>Reverse: 5' - AGT CAA TGC CAA CCA CCA TGC CTA - 3'</b>  |
| <b>CHOP</b>       | <b>Forward: 5' - TAT GAG GAT CTG CAG GAG - 3'</b><br><b>Reverse: 5' - CAG GGT CAA GAG TAG TGA AG - 3'</b>              |
| <b>AgRP</b>       | <b>Forward: 5' - CGG AGG TGC TAG ATC CAC AGA - 3'</b><br><b>Reverse: 5' - AGG ACT CGT GCA GCC TTA CAC - 3'</b>         |
| <b>NPY</b>        | <b>Forward: 5' - TAG GTA ACA AGC GAA TGG GG - 3'</b><br><b>Reverse: 5' - ACA TGG AAG GGT CTT CAA GC - 3'</b>           |
| <b>POMC</b>       | <b>Forward: 5' -TAG ATG TGT GGA GCT GGT GC - 3'</b><br><b>Reverse: 5' - CAG TCA GGG GCT GTT CAT CT - 3'</b>            |
| <b>NSE</b>        | <b>Forward: 5' - CTG ATG CTG GAG TTG GAT G - 3'</b><br><b>Reverse: 5' - CTT CGC TGT TCT CCA GGA TAT - 3'</b>           |
| <b>GPR40</b>      | <b>Forward: 5' - CGC TGG GCT TTC CAT TGA ACT TGT - 3'</b><br><b>Reverse: 5' - ATG TTG ATG CCC AGG GAA CTG GTA - 3'</b> |
| <b>GPR120</b>     | <b>Forward: 5' - TCT ACG TGA TGA CAA TGA GCG GCA - 3'</b><br><b>Reverse: 5' - TCC GCG ATG CTT TCG TGA TCT GTA - 3'</b> |
| <b>IL-1Rec</b>    | <b>Forward: 5' - ACA TCC ATG GGA GAT GCA GGC TAT - 3'</b><br><b>Reverse: 5' - ATC ACA GGG ATG GGT TCT GTG GTT - 3'</b> |
| <b>IL-6Rec</b>    | <b>Forward: 5' - TCA CTG TGC GTT GCA AAC AGT GTC - 3'</b><br><b>Reverse: 5' - ATA CCA CAA GGT TGG CAG GTG GAT - 3'</b> |
